# Supplementary material
Source: PubMed Central journal article supplement (PMC5089209)

# Supplementary Figure 1

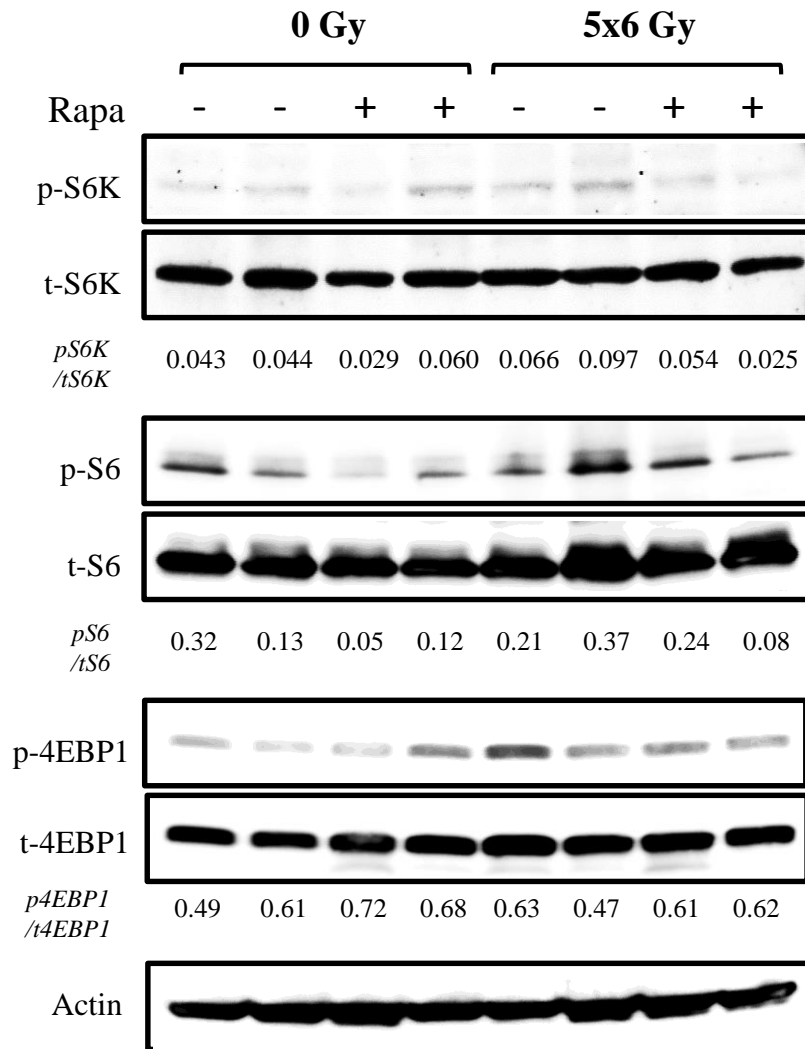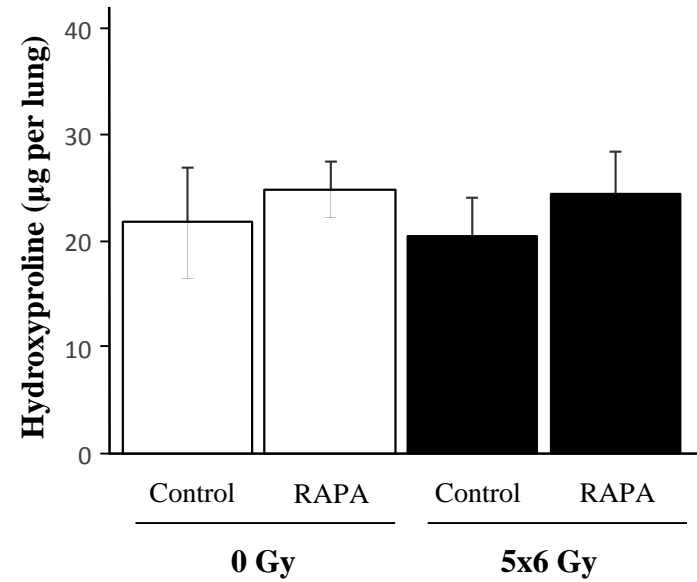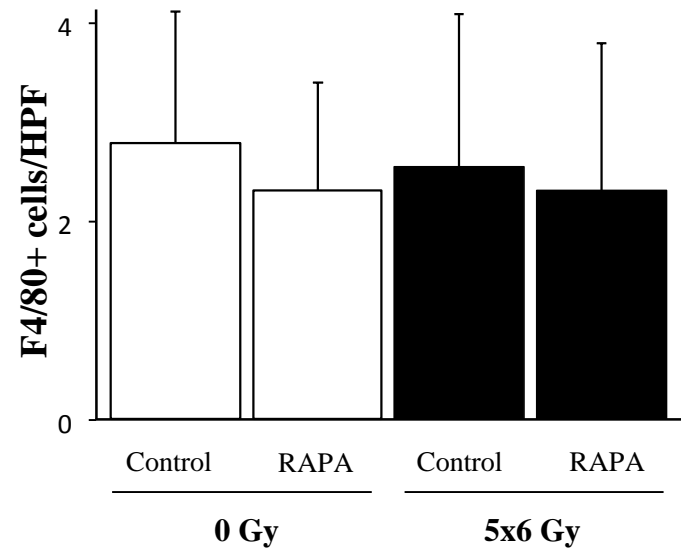

A

B

C

## Supplementary Figure 2

**Control + 0 Gy**

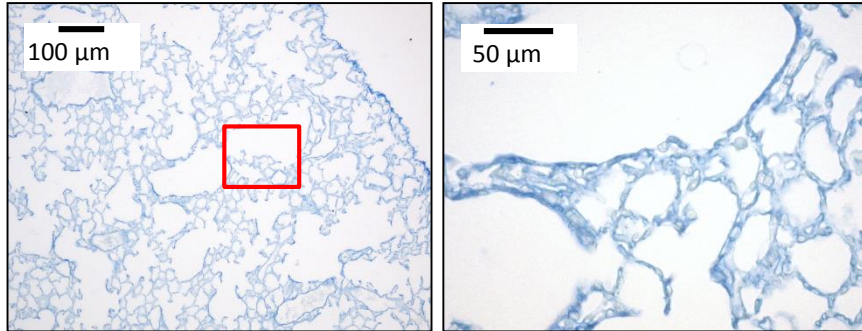

**Control + 5x6 Gy**

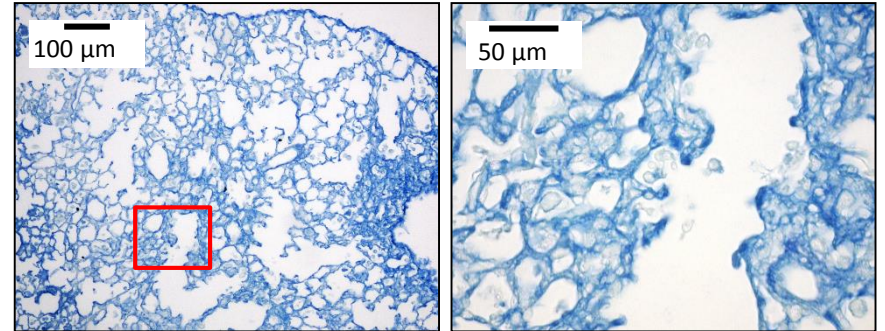

**RAPA + 0 Gy**

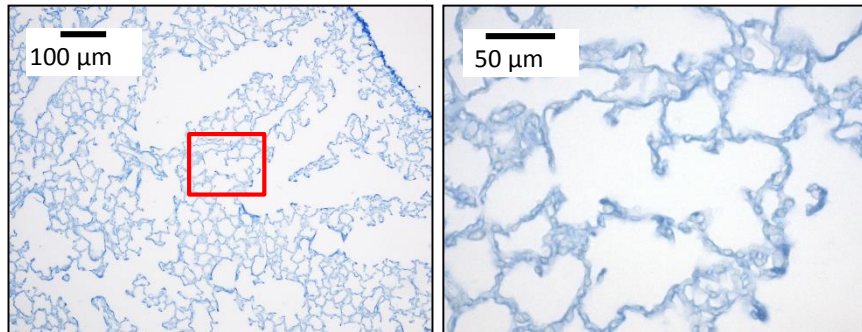

**RAPA + 5x6 Gy**

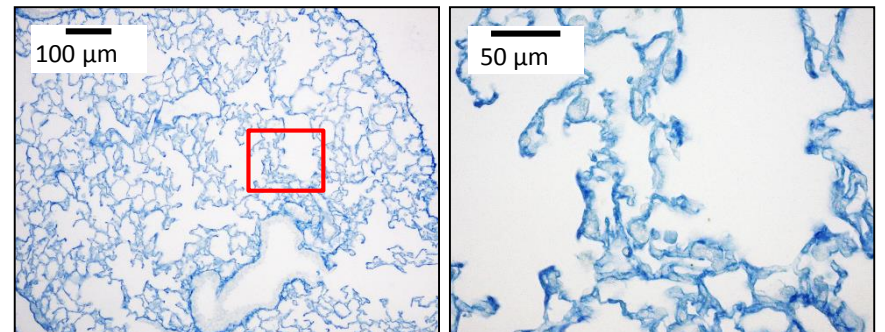

Supplement: NIHMS806572-supplement-1.pdf [file NIHMS806572-supplement-1.pdf]
